# Supplementary material
Source: publisher figshare collection journal article supplement (https://gsapubs.figshare.com/articles/dataset/_/20415783)
Supplement: Supplementary file 1 [file 1]

Lingling Yuan, Xiaohui Zhang, and Zhili Yang, 2022, Late Permian-Triassic ridge subduction beneath the northeastern margin of the North China Craton: Evidence from the Kaiyuan appinitic to high-Mg intermediate intrusions in northern Liaoning, North China: GSA Bulletin, <https://doi.org/10.1130/B36437.1>.

## Supplemental Material

**Figure S1.** Representative Cathodoluminescence (CL) images of the dated zircons from the Kaiyuan intrusive rocks of northern Liaoning in North China

**Figure S2.** Representative CL images of the xenocrystic zircons from the late Permian ultramafic-mafic rocks (sample KY12-1/4) in the Kaiyuan region of northern Liaoning, North China

**Figure S3.** Selected elements vs. Zr variation diagrams for checking element mobility during post-magmatic alteration.

**Table S1.** Representative electron microprobe analyses of minerals in the mafic to intermediate rocks from the Kaiyuan region of northern Liaoning, North China

**Table S2.** SIMS zircon U-Pb analyses for representative samples of the mafic to intermediate rocks from the Kaiyuan region of northern Liaoning, North China

**Table S3.** Major and trace element data for representative samples of these mafic to intermediate intrusive rocks from the Kaiyuan region of northern Liaoning, North China

**Table S4.** Zircon Hf isotopic compositions for representative samples of the mafic to intermediate rocks from the Kaiyuan region of northern Liaoning, North China

**Table S5.** End-members and parameters used in the modeling of Figure 13.

A KY13-11-3

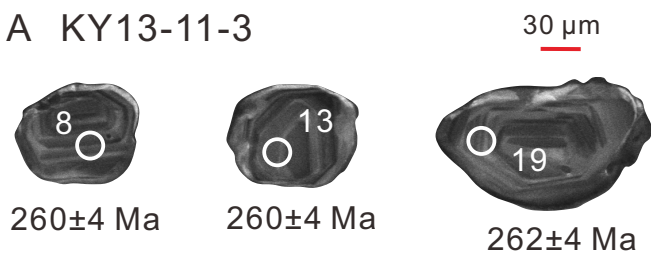

B KY17-6-2

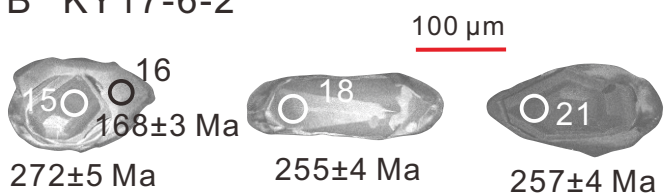

C KY12-1-4

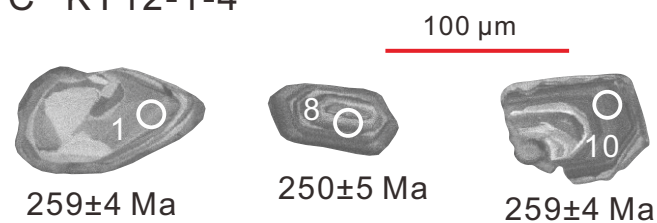

D FX12-30-7

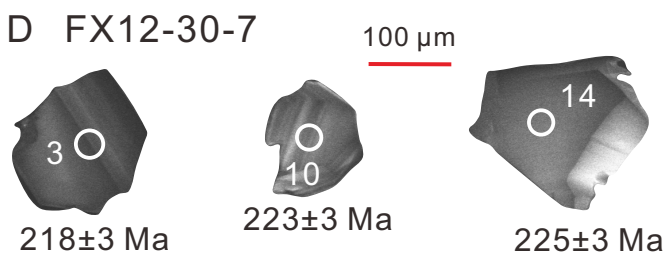

E KY12-10-1

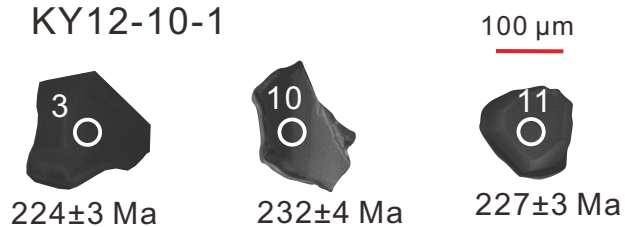

F KY12-8-1

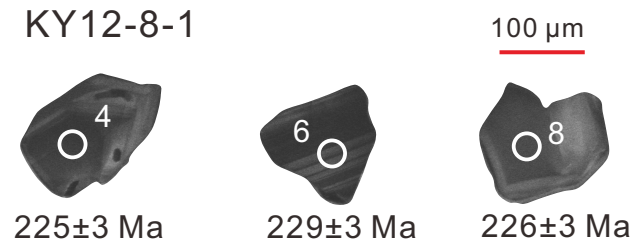

100  $\mu$ m

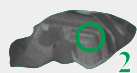

2

296 $\pm$ 4 Ma

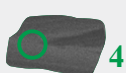

4

1881 $\pm$ 7 Ma

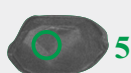

5

423 $\pm$ 6 Ma

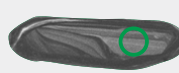

9

918 $\pm$ 12 Ma

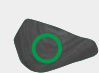

12

907 $\pm$ 10 Ma

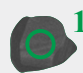

13

940 $\pm$ 17 Ma

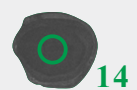

14

1871 $\pm$ 8 Ma

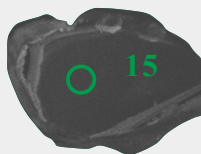

15

929 $\pm$ 8 Ma

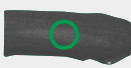

16

923 $\pm$ 5 Ma

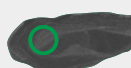

17

434 $\pm$ 6 Ma

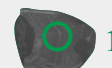

18

775 $\pm$ 11 Ma

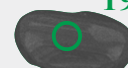

19

2013 $\pm$ 7 Ma

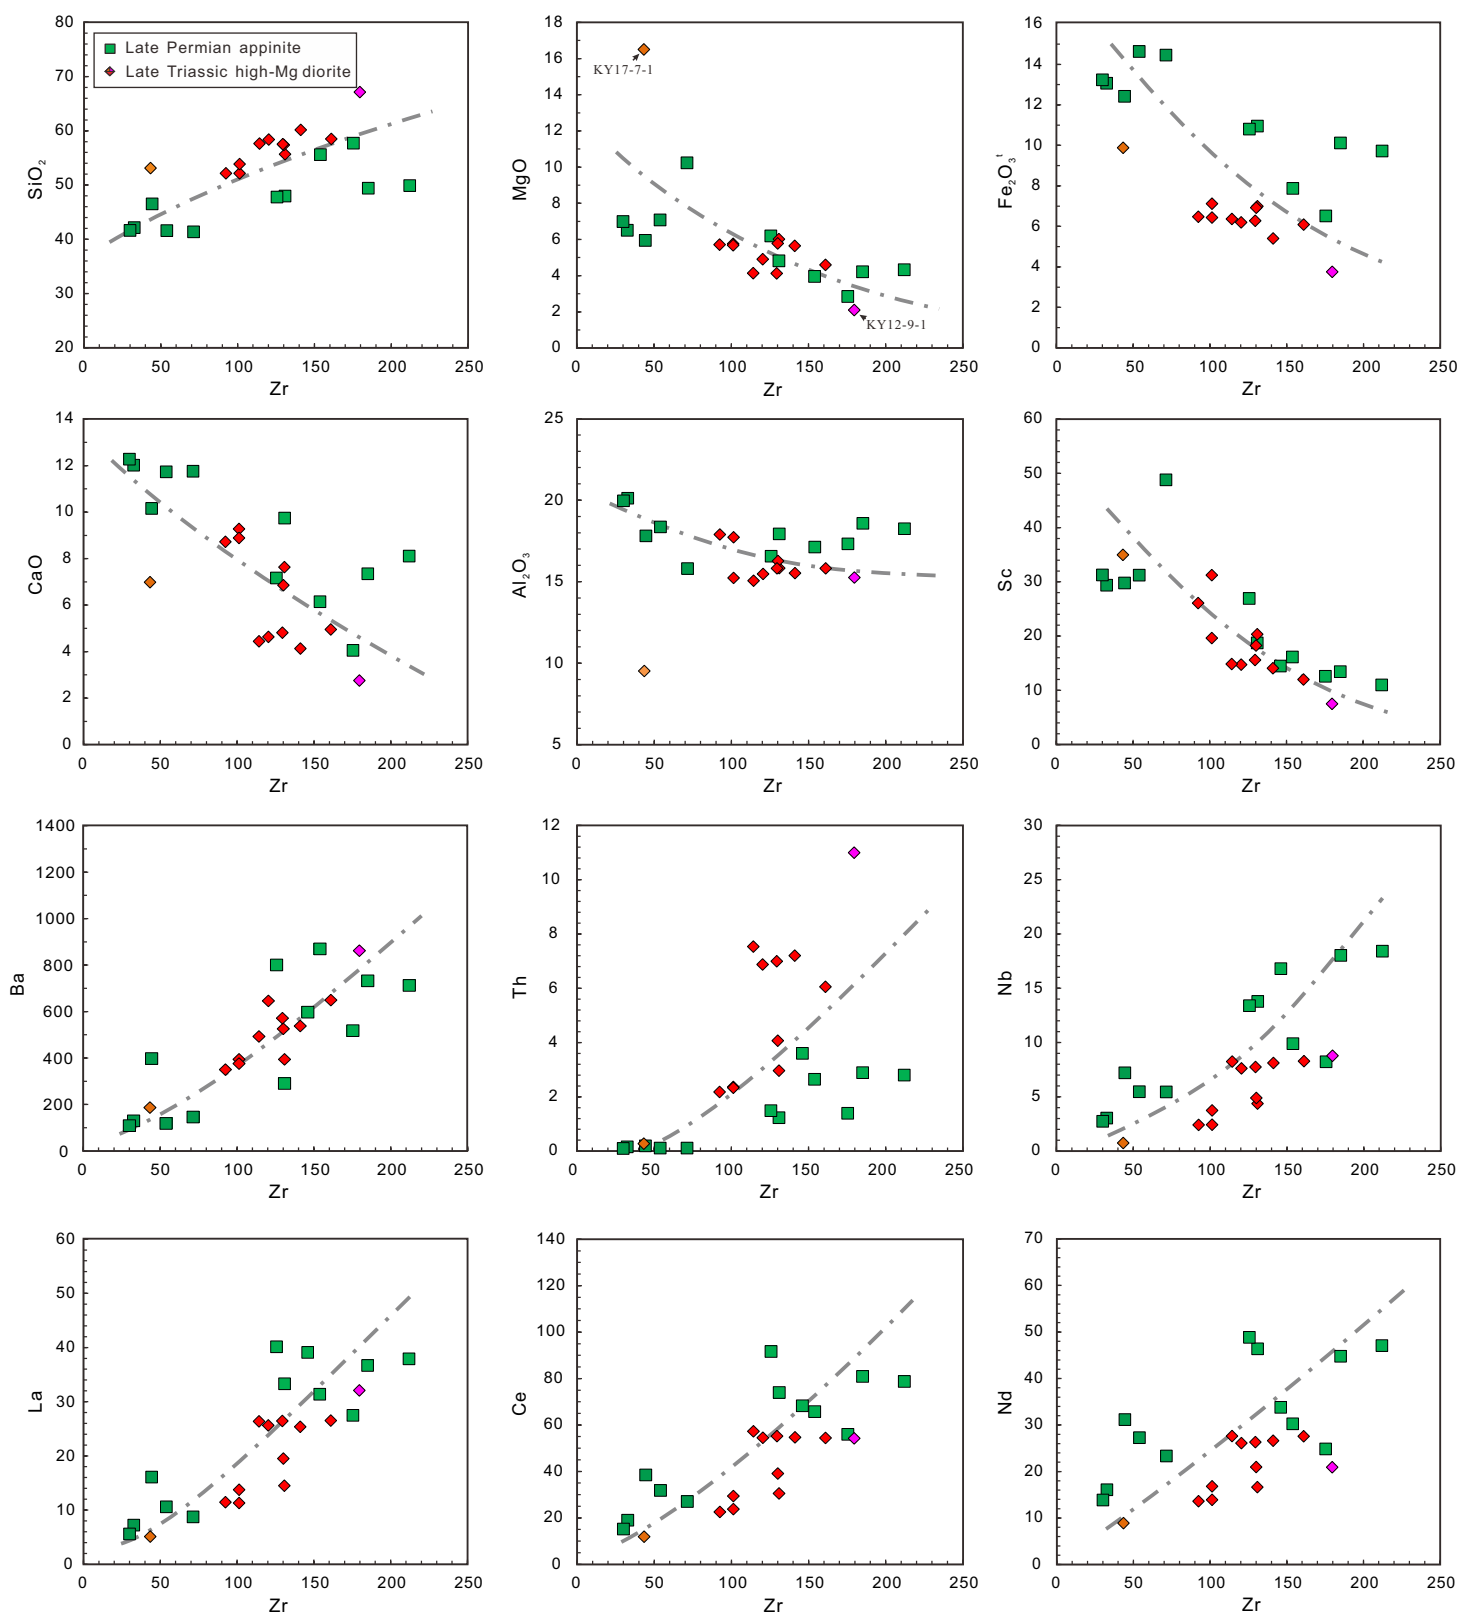

Table S5. End-members and parameters used in the modeling of Figure 13

| End-member component               | Hf ppm | Sm ppm | La ppm | Ba ppm | Nb ppm | Nd ppm | $\epsilon_{\text{Nd}}(t)$ |
|------------------------------------|--------|--------|--------|--------|--------|--------|---------------------------|
| Depleted mantle (DM)               | 0.3    | 0.4    | 0.4    | 3      | 0.3    | 1.2    | 8.9                       |
| Global subducting sediment (GLOSS) | 4.06   | 5.78   | 28.8   | 776    | 8.94   | 27     | -8                        |
| Upper continent crust (UCC)        | 5.8    | 4.7    | 32.3   | 668    | 26     | 25.9   | -10                       |
| $K_D$ (sediment melting)           | 0.2    | 0.05   | 0.1    | 0.02   | 0.8    | 0.05   |                           |
| Mobility                           |        |        |        | 0.08   | 0.005  | 0.03   |                           |
| Dehydration volume                 |        |        |        | 0.02   | 0.02   | 0.02   |                           |
| Sediment fluid                     |        |        |        | 3104   | 2.235  | 40.5   |                           |
| Sediment melt (F=0.1)              | 14.5   | 39.9   | 151.6  | 6576.3 | 10.9   | 186.2  |                           |

*Note:* Element concentrations of GLOSS are from Plank and Langmuir (1998). The Nd isotopic composition of DM is after Yang et al. (2010). Other parameters used in the modeling are from Guo et al. (2015), Zhao et al. (2019) and references therein.

## References cited

- Guo, F., Li, H.X., Fan, W.M., Li, J.Y., Zhao, L.A., Huang, M.W., and Xu, W.L., 2015, Early Jurassic subduction of the Paleo-Pacific Ocean in NE China: Petrologic and geochemical evidence from the Tumen mafic intrusive complex: *Lithos*, v. 224-225, p. 46-60, <https://doi.org/10.1016/j.lithos.2015.02.014>.
- Plank, T., and Langmuir, C.H., 1998, The chemical composition of subducting sediment and its consequences for the crust and mantle: *Chemical Geology*, v. 145, p. 325-394, [https://doi.org/10.1016/s0009-2541\(97\)00150-2](https://doi.org/10.1016/s0009-2541(97)00150-2).
- Yang, J.H., O'Reilly, S., Walker, R.J., Griffin, W., Wu, F.Y., Zhang, M., and Pearson, N., 2010, Diachronous decratonization of the Sino-Korean craton: *Geochemistry of mantle xenoliths from North Korea: Geology*, v. 38, p. 799-802, <https://doi.org/10.1130/G30944.1>.
- Zhao, L.A., Guo, F., Fan, W.M., and Huang, M.W., 2019, Roles of subducted pelagic and terrigenous sediments in Early Jurassic mafic magmatism in NE China: Constraints on the architecture of Paleo-Pacific subduction zone: *Journal of Geophysical Research: Solid Earth*, v. 124, <https://doi.org/10.1029/2018JB016487>.
